# Supplementary material for: Recurrence of pre‐eclampsia and the risk of future hypertension and cardiovascular disease: a systematic review and meta‐analysis
Source: PubMed Central journal article supplement — BJOG. 2018 Aug 10;125(13):1642–54. doi: 10.1111/1471-0528.15394 (PMC6283049; doi:10.1111/1471-0528.15394), 2018-08-10
Supplement: BJO-125-1642-s001.pdf [file BJO-125-1642-s001.pdf]

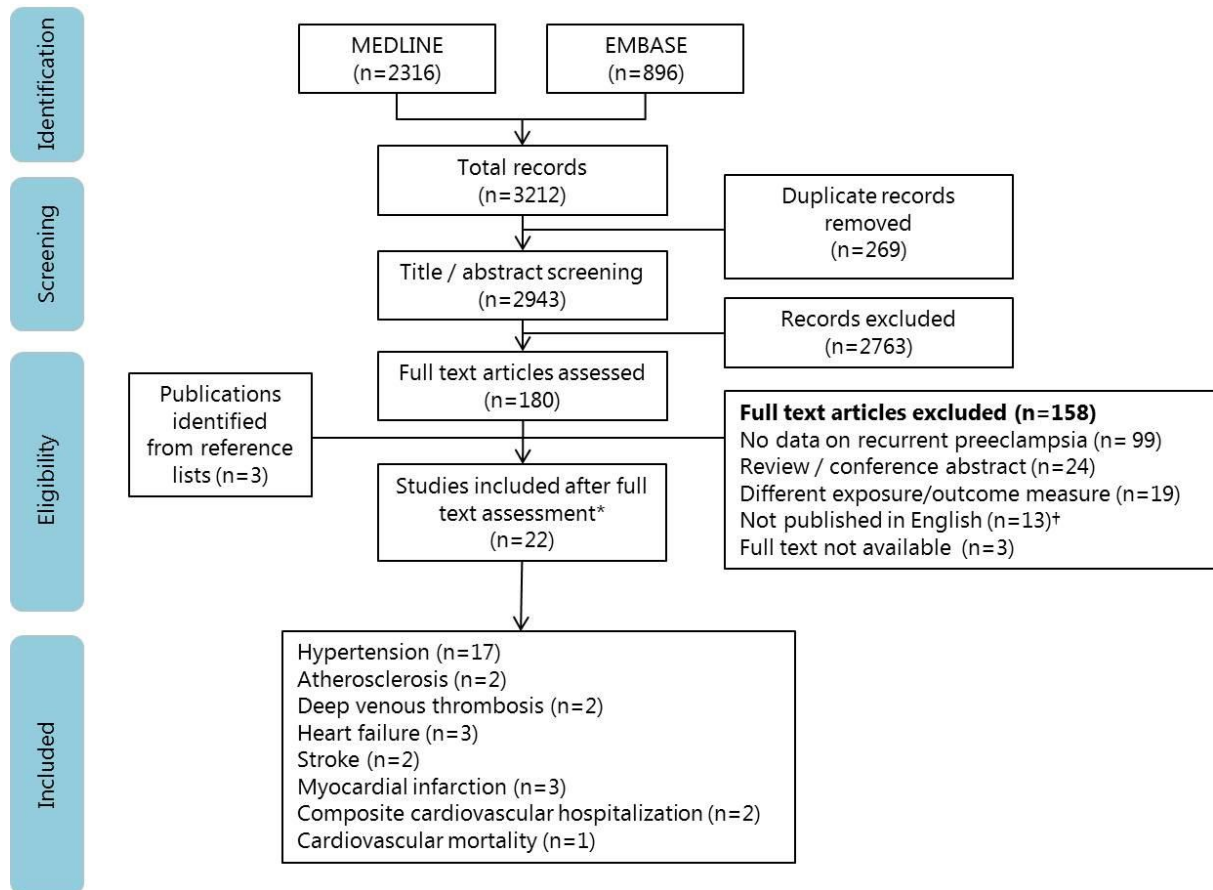

**Figure S1.** Flow chart of literature search for studies reporting on the association between recurrent pre-eclampsia and cardiovascular disease (CVD).

Search performed on June 1st, 2017.

\* Some studies included more than one outcome.

† Only excluded when translation with google translate was insufficient
