# Supplementary material for: Recurrence of pre‐eclampsia and the risk of future hypertension and cardiovascular disease: a systematic review and meta‐analysis
Source: PubMed Central journal article supplement — BJOG. 2018 Aug 10;125(13):1642–54. doi: 10.1111/1471-0528.15394 (PMC6283049; doi:10.1111/1471-0528.15394), 2018-08-10
Supplement: BJO-125-1642-s002.pdf [file BJO-125-1642-s002.pdf]

**Table S1.** Critical appraisal using the Newcastle-Ottawa Quality Assessment Scale for cohort and case-control studies<sup>17</sup>

| <b>Comparative cohort studies</b>        | <b>Selection (max 4 stars)</b> | <b>Comparability (max 2 stars)</b> | <b>Outcome/Exposure (max 3 stars)</b> |
|------------------------------------------|--------------------------------|------------------------------------|---------------------------------------|
| Singh (1974) <sup>36</sup>               | *                              | *                                  | *                                     |
| Sibai (1986) <sup>24</sup>               | ****                           | **                                 | ***                                   |
| Nisell (1995) <sup>30</sup>              | ****                           | *                                  | **                                    |
| Lykke (2009) <sup>21</sup>               | ****                           | **                                 | ***                                   |
| Magnussen (2009) <sup>22</sup>           | ****                           | **                                 | ***                                   |
| Smith (2009) <sup>28</sup>               | ****                           | **                                 | **                                    |
| Skjaerven (2012) <sup>25</sup>           | ****                           | **                                 | ***                                   |
| Kessous (2015) <sup>33</sup>             | ****                           | -                                  | **                                    |
| Scholten (2015) <sup>35</sup>            | ***                            | -                                  | **                                    |
| Engeland (2015) <sup>20</sup>            | ****                           | **                                 | ***                                   |
| Zhang (2015) <sup>34</sup>               | ****                           | *                                  | *                                     |
| Auger (2017) <sup>26</sup>               | ***                            | **                                 | ***                                   |
| Riise (2017) <sup>23</sup>               | ****                           | **                                 | ***                                   |
| <b>Single cohort studies<sup>†</sup></b> | <b>Selection (max 3 stars)</b> | <b>Comparability (max 1 stars)</b> | <b>Outcome/Exposure (max 3 stars)</b> |
| Sibai (1991) <sup>38</sup>               | ***                            | -                                  | **                                    |
| Spaan (2012) <sup>39</sup>               | ***                            | *                                  | *                                     |
| Van Oostwaard (2012) <sup>40</sup>       | **                             | *                                  | **                                    |
| Van Oostwaard (2014) <sup>41</sup>       | **                             | *                                  | **                                    |
| Veerbeek (2015) <sup>37</sup>            | ***                            | *                                  | ***                                   |
| <b>Case-control studies</b>              | <b>Selection (max 4 stars)</b> | <b>Comparability (max 2 stars)</b> | <b>Outcome/Exposure (max 3 stars)</b> |
| Gaugler-Senden (2008) <sup>27</sup>      | ****                           | **                                 | **                                    |
| Ghossein-Doha (2014) <sup>32</sup>       | ***                            | *                                  | **                                    |
| Akhter (2014) <sup>31</sup>              | ***                            | *                                  | **                                    |
| Ghossein-Doha (2017) <sup>29</sup>       | ***                            | *                                  | ***                                   |

<sup>17</sup> See reference 17 from the manuscript text. It is the reference the NOS scale is based on.

<sup>†</sup>cohort study based on one single cohort of preeclamptic women: therefore scoring scale was adjusted: selection: max. 3 stars, comparability: max. 1 star based on use of confounders in analysis, outcome; max. 3 stars.
