# Supplementary material for: Recurrence of pre‐eclampsia and the risk of future hypertension and cardiovascular disease: a systematic review and meta‐analysis
Source: PubMed Central journal article supplement — BJOG. 2018 Aug 10;125(13):1642–54. doi: 10.1111/1471-0528.15394 (PMC6283049; doi:10.1111/1471-0528.15394), 2018-08-10
Supplement: BJO-125-1642-s003.pdf [file BJO-125-1642-s003.pdf]

## **Appendix S1. Search strings**

### PubMed search string

**#1:** "Pre-eclampsia"[MeSH Terms] OR pre-eclampsia [Title/Abstract] OR pre-eclampsia [Title/Abstract]

**#2:** "Follow-up studies"[MeSH] OR "recurrence"[MeSH] OR "later risk"[Title/Abstract] OR "future risk"[Title/Abstract] OR "follow up"[Title/Abstract] OR "long term"[Title/Abstract] OR subsequent[Title/Abstract] OR "later life"[Title/Abstract] OR "later in life"[Title/Abstract] OR subsequently[Title/Abstract] OR future[Title/Abstract] OR history[Title/Abstract] OR previous[Title/Abstract] OR secondary[Title/Abstract] OR recurrent[Title/Abstract] OR recurrence[Title/Abstract]

**#3:** Hypertension [MeSH Terms] OR hypertension [Title/Abstract]

**#4:** Cardiovascular disease [MeSH Terms] OR cardiovascular [Title/Abstract]

Hypertension PubMed search: #1 AND #2 AND #3

Cardiovascular disease PubMed search: #1 AND #2 AND #4

### Embase search string

**#1:** 'pre-eclampsia'/exp OR 'pre-eclampsia':ab,ti OR 'pre-eclampsia':ab,ti

**#2:** 'later risk':ab,ti OR 'future risk':ab,ti OR 'follow up':ab,ti OR 'long term':ab,ti OR 'later life':ab,ti OR 'later in life':ab,ti OR 'subsequently':ab,ti OR 'future':ab,ti OR 'history':ab,ti OR 'previous':ab,ti OR 'secondary':ab,ti OR 'subsequent':ab,ti OR 'recurrence':ab,ti OR 'recurrent':ab,ti OR 'follow up'/exp OR 'recurrent disease'/exp

**#3:** 'hypertension'/exp OR 'hypertension':ab,ti

**#4:** 'cardiovascular disease'/exp OR 'cardiovascular':ab,ti

**#5:** [embase]/lim NOT [medline]/lim

Hypertension Embase search: #1 AND #2 AND #3 AND #5

Cardiovascular disease Embase search: #1 AND #2 AND #4 AND #5

Embase Filters for publication types:

Article/ Article in Press/ Review/ Conference Review

A full list of references and reason of ex- or inclusion is available from the authors.
